# Supplementary material for: A new rare-earth oxyborate Ba3BiPbEuO(BO3)4and the luminescence properties of the Ba3BiPbY1−xEuxO(BO3)4phosphors
Source: Royal Society of Chemistry journal article supplement (doi:10.1039/d2dt01063a), 2022-01-01
Supplement: d2dt01063a1.pdf [file d2dt01063a1.pdf]

## Supporting Information

# A new rare-earth borate $\text{Ba}_3\text{BiPbEuO}(\text{BO}_3)_4$ and luminescent properties of the $\text{Ba}_3\text{BiPbY}_{1-x}\text{Eu}_x\text{O}(\text{BO}_3)_4$ phosphors

Xuean Chen<sup>a,\*</sup>, Ruru Bian<sup>a</sup>, Weiqiang Xiao<sup>b</sup> and Xiaoyan Song<sup>a</sup>

<sup>a</sup>Faculty of Materials and Manufacturing, Key Laboratory of Advanced Functional Materials, Ministry of Education of China, Beijing University of Technology, 100124 Beijing, China.

E-mail: [xueanchen@bjut.edu.cn](mailto:xueanchen@bjut.edu.cn)

<sup>b</sup>Beijing Key Laboratory of Microstructure and Property of Solids, Beijing University of Technology, 100124 Beijing, China

### Content

1. **Table S1** Atomic coordinates and equivalent isotropic displacement parameters ( $\text{\AA}^2$ ) for  $\text{Ba}_3\text{BiPbEuO}(\text{BO}_3)_4$ .
2. **Table S2** Selected bond lengths ( $\text{\AA}$ ) and angles ( $^\circ$ ) for  $\text{Ba}_3\text{BiPbEuO}(\text{BO}_3)_4$ .
3. **Table S3** Le Bail refinement results of  $\text{Ba}_3\text{BiPbY}_{1-x}\text{Eu}_x\text{O}(\text{BO}_3)_4$  ( $0 \leq x \leq 1$ ) using the software package TOPAS.
4. **Table S4** The spectral data on the  $\text{Pb}^{2+}$  and  $\text{Bi}^{3+}$  luminescence in various inorganic hosts.
5. **Fig. S1** The local environment of each cation site in  $\text{Ba}_3\text{BiPbEuO}(\text{BO}_3)_4$ .
6. **Fig. S2** Le Bail refinements of powder X-ray diffractograms of the  $\text{Ba}_3\text{BiPbY}_{1-x}\text{Eu}_x\text{O}(\text{BO}_3)_4$  solid solutions ( $x = 0.1, 0.2, 0.4, 0.6$  and  $0.8$ ).
7. **Fig. S3** Correlation diagram of the  $\text{BO}_3$  internal vibrations in  $\text{Ba}_3\text{BiPbEuO}(\text{BO}_3)_4$ , space group  $P6_3/mmc$ .
8. **Fig. S4** Infrared (a) and Raman (b) spectra of  $\text{Ba}_3\text{BiPbEuO}(\text{BO}_3)_4$ .
9. **Fig. S5** Survey (a) and core-level spectra of Ba 3d (b), Bi 4f(c), Pb 4f(d), Eu 3d (e), B 1s (f), and O 1s (g) for  $\text{Ba}_3\text{BiPbEuO}(\text{BO}_3)_4$ .
10. **Fig. S6** UV-vis absorption spectrum of  $\text{Ba}_3\text{BiPbEuO}(\text{BO}_3)_4$  as compared with that of  $\text{Ba}_3\text{BiPbYO}(\text{BO}_3)_4$ .
11. **Fig. S7** Schematic representation of the energy level scheme of a free ion with  $ns^2$  configuration ( $\text{Pb}^{2+}$ ,  $\text{Bi}^{3+}$  etc.).
12. **Fig. S8** PLE spectra of  $\text{Ba}_3\text{BiPbY}_{1-x}\text{Eu}_x\text{O}(\text{BO}_3)_4$  ( $0.1 \leq x \leq 1.0$ ) phosphors.
13. **Fig. S9** Excitation line of  $\text{BaSO}_4$  reference and the PL spectrum of the  $\text{Ba}_3\text{BiPbEuO}(\text{BO}_3)_4$  phosphor collected using an integrating sphere ( $\lambda_{\text{ex}} = 394 \text{ nm}$ ).

**Table S1** Atomic coordinates and equivalent isotropic displacement parameters ( $\text{\AA}^2$ ) for  $\text{Ba}_3\text{BiPbEuO}(\text{BO}_3)_4$ .

| Atoms   | Wyck sites | Site symmetry | x          | y          | z          | $U_{\text{eq}}$ |
|---------|------------|---------------|------------|------------|------------|-----------------|
| Ba1     | 4f         | $C_{3v}$      | 0.6667     | 0.3333     | 0.08912(4) | 0.0138(3)       |
| Ba2     | 2d         | $D_{3h}$      | 0.6667     | 0.3333     | 0.2500     | 0.0213(5)       |
| Bi1/Pb1 | 4e         | $C_{3v}$      | 0.0000     | 0.0000     | 0.16879(4) | 0.0377(4)       |
| Eu1     | 2a         | $D_{3d}$      | 0.0000     | 0.0000     | 0.0000     | 0.0074(3)       |
| B1      | 4f         | $C_{3v}$      | 0.3333     | 0.6667     | 0.0541(9)  | 0.015(3)        |
| B2      | 4f         | $C_{3v}$      | 0.3333     | 0.6667     | 0.1722(8)  | 0.013(3)        |
| O1      | 12k        | $C_s$         | 0.1875(11) | 0.375(2)   | 0.0548(4)  | 0.0208(18)      |
| O2      | 12k        | $C_s$         | 0.039(2)   | 0.5195(12) | 0.1720(3)  | 0.024(2)        |
| O3      | 2b         | $D_{3h}$      | 0.0000     | 0.0000     | 0.2500     | 0.021(4)        |

Note: Bi1/Pb1 has the composition  $\text{Bi}_{0.5}\text{Pb}_{0.5}$ .  $U_{\text{eq}}$  is defined as one third of the trace of the orthogonalized  $U$  tensor.

**Table S2** Selected bond lengths ( $\text{\AA}$ ) and angles ( $^\circ$ ) for  $\text{Ba}_3\text{BiPbEuO}(\text{BO}_3)_4$ .

|                      |            |                       |           |
|----------------------|------------|-----------------------|-----------|
| Ba1-O2 $\times$ 3    | 2.798(10)  | Bi1/Pb1-O2 $\times$ 6 | 2.7228(8) |
| Ba1-O1 $\times$ 6    | 2.869(3)   | Eu1-O1 $\times$ 6     | 2.279(10) |
| Ba2-O2 $\times$ 6    | 2.701(10)  | B1-O1 $\times$ 3      | 1.372(11) |
| Ba2-O3 $\times$ 3    | 3.1353(1)  | B2-O2 $\times$ 3      | 1.384(11) |
| Bi1/Pb1-O3           | 2.1399(11) |                       |           |
| O1-Eu1-O1 $\times$ 3 | 180.0(8)   | O1-B1-O1 $\times$ 3   | 119.98(6) |
| O1-Eu1-O1 $\times$ 6 | 84.1(4)    | O2-B2-O2 $\times$ 3   | 120.00(2) |
| O1-Eu1-O1 $\times$ 6 | 95.9(4)    |                       |           |

**Table S3** Le Bail refinement results of  $\text{Ba}_3\text{BiPbY}_{1-x}\text{Eu}_x\text{O}(\text{BO}_3)_4$  ( $0 \leq x \leq 1$ ) using the software package TOPAS.

| Eu <sup>3+</sup> content | x=0         | x=0.1       | x=0.2       | x=0.4       | x=0.6      | x=0.8       | x=1.0       |
|--------------------------|-------------|-------------|-------------|-------------|------------|-------------|-------------|
| Space group              | $P6_3/mmc$  | $P6_3/mmc$  | $P6_3/mmc$  | $P6_3/mmc$  | $P6_3/mmc$ | $P6_3/mmc$  | $P6_3/mmc$  |
| $a$ ( $\text{\AA}$ )     | 5.41223(14) | 5.41512(15) | 5.41626(16) | 5.42260(13) | 5.4262(7)  | 5.42907(12) | 5.42809(17) |
| $c$ ( $\text{\AA}$ )     | 26.0981(8)  | 26.1096(8)  | 26.1364(8)  | 26.2276(8)  | 26.285(3)  | 26.3217(7)  | 26.3430(9)  |
| $V$ ( $\text{\AA}^3$ )   | 662.05(4)   | 663.05(4)   | 664.01(5)   | 667.89(4)   | 670.24(18) | 671.89(4)   | 672.19(5)   |
| $R_p$ , %                | 3.03        | 2.99        | 2.77        | 3.03        | 2.69       | 2.87        | 2.54        |
| $R_{wp}$ , %             | 4.95        | 4.66        | 4.43        | 4.75        | 4.26       | 4.54        | 4.09        |
| GOF                      | 2.16        | 1.99        | 1.90        | 2.14        | 1.83       | 1.94        | 1.82        |

**Table S4** The spectral data on the Pb<sup>2+</sup> and Bi<sup>3+</sup> luminescence in various inorganic hosts.

| Host                                                                   | $\lambda_{\text{exc}}$ (nm) | $\lambda_{\text{ems}}$ (nm) | Stokes shift (cm <sup>-1</sup> ) | Ref.  |
|------------------------------------------------------------------------|-----------------------------|-----------------------------|----------------------------------|-------|
| SrB <sub>2</sub> O <sub>4</sub> :Pb <sup>2+</sup>                      | 270                         | 363                         | 9489                             | [S1]  |
| Sr <sub>6</sub> YAl(BO <sub>3</sub> ) <sub>6</sub> :Pb <sup>2+</sup>   | 277                         | 371                         | 9147                             | [S2]  |
| CaZr(BO <sub>3</sub> ) <sub>2</sub> :Pb <sup>2+</sup>                  | 250                         | 415                         | 15903                            | [S3]  |
| LiCaBO <sub>3</sub> :Pb <sup>2+</sup>                                  | 265                         | 296                         | 3952                             | [S4]  |
| BaB <sub>2</sub> O <sub>4</sub> : Pb <sup>2+</sup>                     | 240                         | 370                         | 14640                            | [S5]  |
| CaB <sub>2</sub> O <sub>4</sub> : Pb <sup>2+</sup>                     | 254                         | 325                         | 8600                             | [S6]  |
| CaAl <sub>2</sub> O <sub>4</sub> :Pb <sup>2+</sup>                     | 237                         | 360                         | 14416                            | [S7]  |
| LiBa <sub>2</sub> B <sub>5</sub> O <sub>10</sub> :Pb <sup>2+</sup>     | 245                         | 430                         | 17560                            | [S8]  |
| Li <sub>4</sub> SrCa(SiO <sub>4</sub> ) <sub>2</sub> :Pb <sup>2+</sup> | 249                         | 290                         | 5678                             | [S9]  |
| BaB <sub>8</sub> O <sub>13</sub> :Pb <sup>2+</sup>                     | 230                         | 360                         | 15700                            | [S10] |
| Sr <sub>6</sub> YAl(BO <sub>3</sub> ) <sub>6</sub> :Bi <sup>3+</sup>   | 325                         | 422                         | 7073                             | [S2]  |
| Li <sub>4</sub> SrCa(SiO <sub>4</sub> ) <sub>2</sub> :Bi <sup>3+</sup> | 310                         | 380                         | 5942                             | [S9]  |
| BaLa <sub>2</sub> ZnO <sub>5</sub> :Bi <sup>3+</sup>                   | 320                         | 410                         | 6860                             | [S11] |
| LaInO <sub>3</sub> :Bi <sup>3+</sup>                                   | 340                         | 420                         | 5602                             | [S12] |
| CaZrO <sub>3</sub> :Bi <sup>3+</sup>                                   | 320                         | 390                         | 5609                             | [S13] |
| NaLuGeO <sub>4</sub> :Bi <sup>3+</sup>                                 | 316                         | 400                         | 6646                             | [S14] |
| MgAl <sub>2</sub> O <sub>4</sub> :Bi <sup>3+</sup>                     | 335                         | 400                         | 4851                             | [S15] |
| LaYO <sub>3</sub> :Bi <sup>3+</sup>                                    | 330                         | 493                         | 10019                            | [S16] |
| (Ba,Sr) <sub>3</sub> Sc <sub>4</sub> O <sub>9</sub> :Bi <sup>3+</sup>  | 330                         | 526                         | 11292                            | [S17] |
| Ca <sub>3</sub> Bi(PO <sub>4</sub> ) <sub>3</sub> :Bi <sup>3+</sup>    | 326                         | 434                         | 7633                             | [S18] |

Note: the Stokes shift is defined as energy difference between the intensity maxima in the excitation and emission bands.

## References

- [S1] İ. Pekgözlü, H. Karabulut, Synthesis and Photoluminescence of Pb<sup>2+</sup> Doped SrB<sub>2</sub>O<sub>4</sub>, *Inorg. Mater.*, 2009, **45**, 61–64.
- [S2] R. Sankar, G.V.S. Rao, Luminescence studies on doped borates, A<sub>6</sub>MM'(BO<sub>3</sub>)<sub>6</sub>, *J. Alloys. Compd.*, 1998, **281**, 126–136.
- [S3] G. Blasse, S.J.M. Sas, W.M.A. Smit, Luminescent materials with dolomite structure, *Mater. Chem. Phys.*, 1986, **14**, 253–258.
- [S4] İ. Pekgözlü, E. Erdoğan, S. Çubuk, A.S. Başak, Synthesis and photoluminescence of LiCaBO<sub>3</sub>:M (M: Pb<sup>2+</sup> and Bi<sup>3+</sup>) phosphor, *J. Lumin.*, 2012, **132**, 1394–1399.
- [S5] A.B. Gawande, R.P. Sonekar, S. K. Omanwar, Photoluminescence Properties of Combustion Synthesized BaB<sub>2</sub>O<sub>4</sub>:Pb<sup>2+</sup> Phosphor, *Combust. Sci. Technol.*, 2014, **186**, 1928–1935.
- [S6] H. Witzmann, J. Buhrow, K. Müller, Zum emissionsvermögen blei-manganaktivierter kalziumboratphosphore (CaO·B<sub>2</sub>O<sub>3</sub>-Pb, Mn), *Naturwissenschaften*, 1964, **51**, 103.
- [S7] C.P. Joshi, S.V. Moharil, Luminescence of Pb<sup>2+</sup> in some aluminates prepared by combustion synthesis, *Phys. Stat. Sol. (b)*, 2000, **220**, 985–989.
- [S8] G.J. Dirksen, G. Blasse, Luminescence in the Pentaborate LiBa<sub>2</sub>B<sub>5</sub>O<sub>10</sub>, *J. Solid State Chem.*, 1991, **92**, 591–593.
- [S9] İ. Pekgözlü, E. Erdoğan, M. Yılmaz, Synthesis and photoluminescence properties of Li<sub>4</sub>SrCa(SiO<sub>4</sub>)<sub>2</sub>: M (M: Pb<sup>2+</sup> and Bi<sup>3+</sup>), *J. Lumin.*, 2015, **161**, 160–163.
- [S10] E. Erdoğan, E. Korkmaz, V.E. Kafadar, Luminescence of a novel near-UV emitting phosphor BaB<sub>8</sub>O<sub>13</sub>:Pb<sup>2+</sup>, *J. Appl. Spectrosc.*, 2014, **80**, 945–949.

- [S11] Y.S. Chang, Blue emitting phosphors of BaLa<sub>2</sub>ZnO<sub>5</sub> activated by Bismuth ions, *J. Electrochem. Soc.*, 2011, **158**, J115–J119.
- [S12] L.I. van Steensel, S.G. Bokhove, A.M. van de Craats, J. de Blank, G. Blasse, The luminescence of Bi<sup>3+</sup> in LaInO<sub>3</sub> and some other perovskites, *Mater. Res. Bull.*, 1995, **30**, 1359-1362.
- [S13] H. Witzmann, H. Anderson, D. Walther, Zur Lumineszenz wismutaktivierter Zirkondioxid-Calciumoxid-Phasen, *Zeitschrift für Physikalische Chemie*, 1968, **239**, 243-251.
- [S14] W.X. Wang, Z.Y. Sun, X.Y. He, Y.D. Wei, Z.H. Zou, J.C. Zhang, Z.F. Wang, Z.Y. Zhang, Y.H. Wang, How to design ultraviolet emitting persistent materials for potential multifunctional applications: a living example of a NaLuGeO<sub>4</sub>: Bi<sup>3+</sup>, Eu<sup>3+</sup> phosphor, *J. Mater. Chem. C*, 2017, **5**, 4310-4318.
- [S15] W.A.I. Tabaza, H.C. Swart, R.E. Kroon, Optical properties of Bi and energy transfer from Bi to Tb in MgAl<sub>2</sub>O<sub>4</sub> phosphor, *J. Lumin.*, 2014, **148**, 192–197.
- [S16] D.R. Taikar, Sumedha Tamboli, S.J. Dhoble, Synthesis and photoluminescence properties of red, green and blue emitting LaYO<sub>3</sub>:M (M = Eu<sup>3+</sup>, Tb<sup>3+</sup>, Sm<sup>3+</sup>, Bi<sup>3+</sup>, Pb<sup>2+</sup>) phosphors, *Optik*, 2017, **142**, 183-190.
- [S17] P.P. Dang, S.S. Liang, G.G. Li, H.Z. Lian, M.M. Shang, J. Lin, Broadly color tuning of Bi<sup>3+</sup>/Eu<sup>3+</sup>-doped (Ba, Sr)<sub>3</sub>Sc<sub>4</sub>O<sub>9</sub> solid solution compounds via crystal field modulation and energy transfer, *J. Mater. Chem. C*, 2018, **6**, 9990–9999.
- [S18] M.K. Sahu, M. Jayasimhadri, Conversion of blue emitting thermally stable Ca<sub>3</sub>Bi(PO<sub>4</sub>)<sub>3</sub> host as a color tunable phosphor via energy transfer for luminescent devices, *J. Lumin.*, 2020, **227**, 117570.

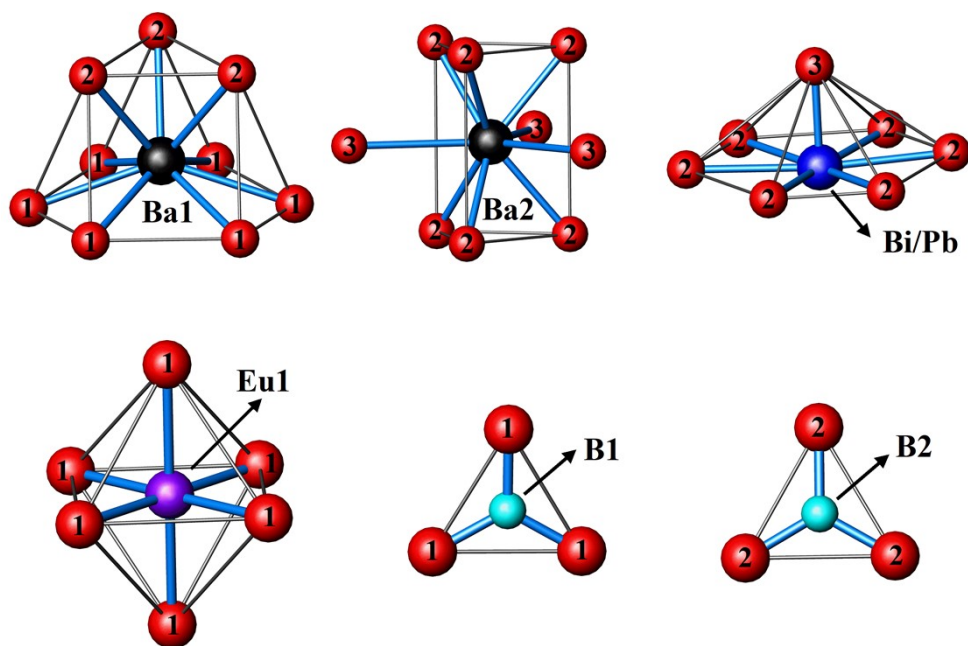

**Fig. S1** The local environment of each cation site in  $\text{Ba}_3\text{BiPbEuO}(\text{BO}_3)_4$  (the numbers correspond to the oxygen atom designations). Ba: black balls; Bi/Pb: blue balls; Eu: magenta balls; B: cyan balls; O: red balls.

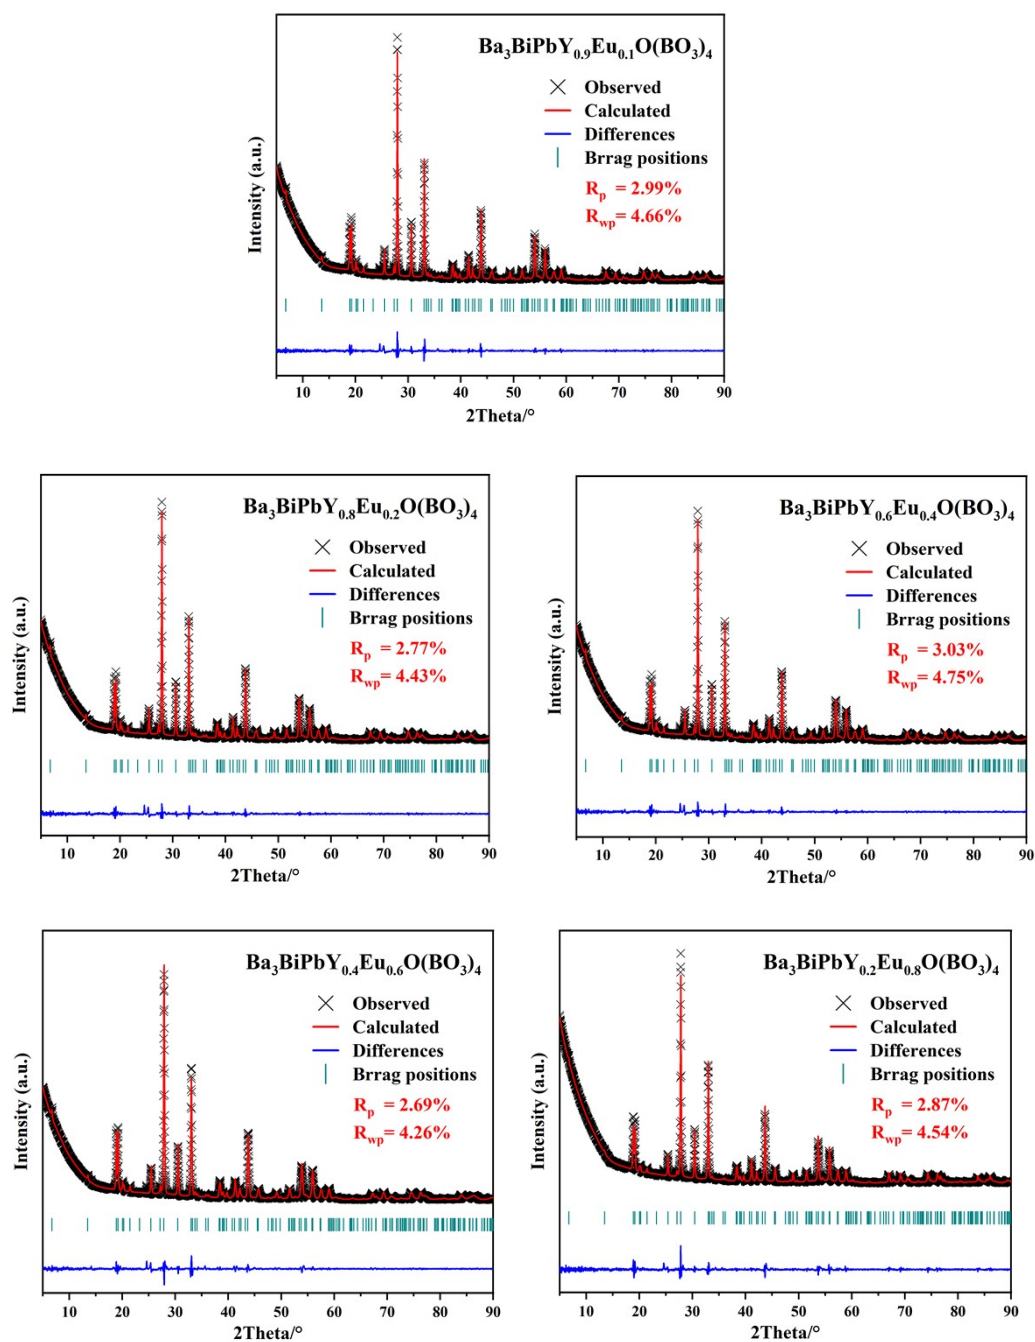

**Fig. S2** Le Bail refinements of powder X-ray diffractograms of the  $\text{Ba}_3\text{BiPbY}_{1-x}\text{Eu}_x\text{O}(\text{BO}_3)_4$  solid solutions ( $x = 0.1, 0.2, 0.4, 0.6$  and  $0.8$ ).

| Species               | Molecular symmetry                   | Site symmetry         | Crystal symmetry                                     |
|-----------------------|--------------------------------------|-----------------------|------------------------------------------------------|
| <b>BO<sub>3</sub></b> | <b>D<sub>3h</sub></b>                | <b>C<sub>3v</sub></b> | <b>D<sub>6h</sub></b>                                |
|                       | A <sub>1</sub> '(v <sub>1</sub> )    | A <sub>1</sub>        | A <sub>1g</sub> (2v <sub>1</sub> , 2v <sub>2</sub> ) |
|                       | A <sub>2</sub> ''(v <sub>2</sub> )   |                       | A <sub>2u</sub> (2v <sub>1</sub> , 2v <sub>2</sub> ) |
|                       |                                      |                       | B <sub>1g</sub> (2v <sub>1</sub> , 2v <sub>2</sub> ) |
|                       |                                      |                       | B <sub>2u</sub> (2v <sub>1</sub> , 2v <sub>2</sub> ) |
|                       |                                      | E                     | E <sub>1g</sub> (2v <sub>3</sub> , 2v <sub>4</sub> ) |
|                       | E'(v <sub>3</sub> , v <sub>4</sub> ) |                       | E <sub>1u</sub> (2v <sub>3</sub> , 2v <sub>4</sub> ) |
|                       |                                      |                       | E <sub>2g</sub> (2v <sub>3</sub> , 2v <sub>4</sub> ) |
|                       |                                      |                       | E <sub>2u</sub> (2v <sub>3</sub> , 2v <sub>4</sub> ) |

**Fig. S3** Correlation diagram of the BO<sub>3</sub> internal vibrations in Ba<sub>3</sub>BiPbEuO(BO<sub>3</sub>)<sub>4</sub>, space group *P6<sub>3</sub>/mmc*

It is well-known that the free BO<sub>3</sub> unit with D<sub>3h</sub> symmetry has 12 vibrational degrees of freedom, and its irreducible representations of the normal modes can be written as follows:  $\Gamma_{\text{BO}_3} = 1A_1' + 1A_2' + 2A_2'' + 3E' + 1E''$ , where  $1A_2'' + 1E'$  are translational modes,  $1A_2' + 1E''$  are rotational modes, and the rest ( $1A_1' + 1A_2'' + 2E'$ ) are internal modes.<sup>46</sup> Ba<sub>3</sub>BiPbEuO(BO<sub>3</sub>)<sub>4</sub> crystallizes in the hexagonal space group *P6<sub>3</sub>/mmc* (D<sub>6h</sub><sup>4</sup>, no. 194), and its primitive cell comprises eight BO<sub>3</sub> units. Each B atom is surrounded by three oxygen atoms of the same type, so the BO<sub>3</sub> group is an equilateral triangle with site symmetry C<sub>3v</sub> (see Table S1 and Fig. S1). In this case, the factor group analysis (see the correlation diagram in Fig. S3) predicts that the internal modes of the BO<sub>3</sub> units give rise to 48 lattice vibrations ( $4A_{1g} + 4A_{2u} + 4B_{1g} + 4B_{2u} + 4E_{2u} + 4E_{2g} + 4E_{1u} + 4E_{1g}$ ). Similarly, we can deduce that 24 lattice vibrations ( $2A_{1g} + 2A_{2u} + 2B_{1g} + 2B_{2u} + 2E_{2u} + 2E_{2g} + 2E_{1u} + 2E_{1g}$ ) originate from the translational modes of the BO<sub>3</sub> units, and 24 lattice vibrations ( $2A_{1u} + 2A_{2g} + 2B_{1u} + 2B_{2g} + 2E_{2u} + 2E_{2g} + 2E_{1u} + 2E_{1g}$ ) from the rotational modes. The Ba atoms occupy two structure positions: 4f and 2d with C<sub>3v</sub> and D<sub>3h</sub> site symmetry, respectively. The disordered (Bi/Pb) and Eu atoms occupy positions 4e and 2a with C<sub>3v</sub> and D<sub>3d</sub> site symmetry, respectively. The O3 atom, that is an oxygen not bonded to B atoms, is located at the 2b Wyckoff site also with D<sub>3h</sub> site symmetry. These atoms contribute totally with  $2A_{1g} + 5A_{2u} + 4B_{1g} +$



$3B_{2u} + 3E_{2u} + 4E_{2g} + 5E_{1u} + 2E_{1g}$  translational modes. Summing all these modes and subtracting the acoustic modes ( $A_{2u} + E_{1u}$ ), one gets the following optical vibrational modes of the crystal:  $\Gamma_{\text{opt}} = 8A_{1g} + 2A_{1u} + 2A_{2g} + 10A_{2u} + 10B_{1g} + 2B_{1u} + 2B_{2g} + 9B_{2u} + 11E_{2u} + 12E_{2g} + 12E_{1u} + 10E_{1g}$ , in which the  $10A_{2u} + 12E_{1u}$  modes are IR-active, the  $8A_{1g} + 12E_{2g} + 10E_{1g}$  modes are Raman-active, while the rest of the modes ( $2A_{1u} + 2A_{2g} + 10B_{1g} + 2B_{1u} + 2B_{2g} + 9B_{2u} + 11E_{2u}$ ) are silent.

Furthermore, the internal vibrations of  $\text{BO}_3$  units can be subdivided into:  $\nu_1(2A_{1g} + 2A_{2u} + 2B_{1g} + 2B_{2u})$  – symmetric stretching,  $\nu_2(2A_{1g} + 2A_{2u} + 2B_{1g} + 2B_{2u})$  – out-of-plane bending,  $\nu_3(2E_{2u} + 2E_{2g} + 2E_{1u} + 2E_{1g})$  – antisymmetric stretching, and  $\nu_4(2E_{2u} + 2E_{2g} + 2E_{1u} + 2E_{1g})$  – in-plane bending modes. Thus, the analysis shows that one expects to observe 12 modes in Raman and 8 modes in IR spectra for the  $\text{BO}_3$  units, with the modes:  $\nu_1(2A_{1g}) + \nu_2(2A_{1g}) + \nu_3(2E_{2g} + 2E_{1g}) + \nu_4(2E_{2g} + 2E_{1g})$  and  $\nu_1(2A_{2u}) + \nu_2(2A_{2u}) + \nu_3(2E_{1u}) + \nu_4(2E_{1u})$ , respectively. Here,  $E_{2g}$ ,  $E_{1g}$ , and  $E_{1u}$  are twofold degenerated and often considered as one mode.

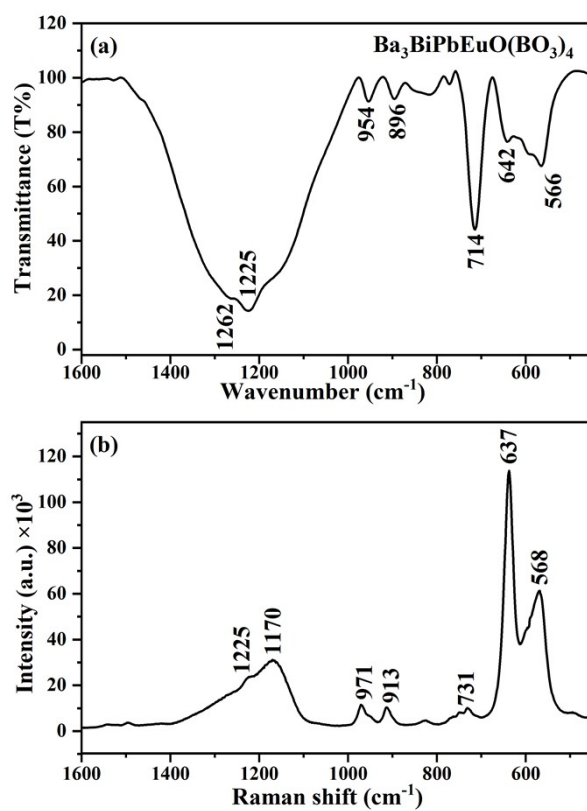

**Fig. S4** Infrared (a) and Raman (b) spectra (excited by a 785 nm laser) of  $\text{Ba}_3\text{BiPbEuO}(\text{BO}_3)_4$ .

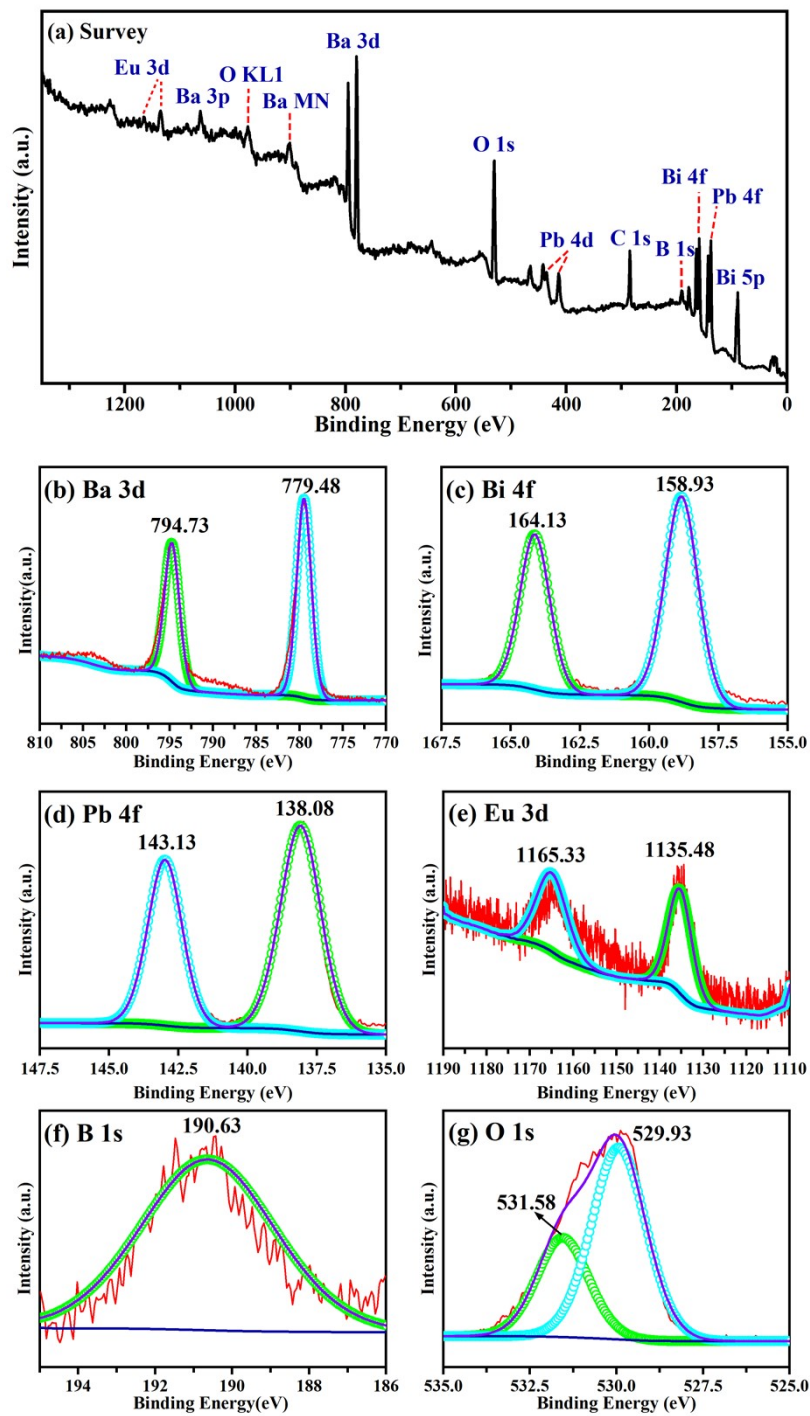

**Fig. S5** Survey (a) and core-level spectra of Ba 3d (b), Bi 4f (c), Pb 4f (d), Eu 3d (e), B 1s (f), and O 1s (g) for  $\text{Ba}_3\text{BiPbEuO}(\text{BO}_3)_4$ .

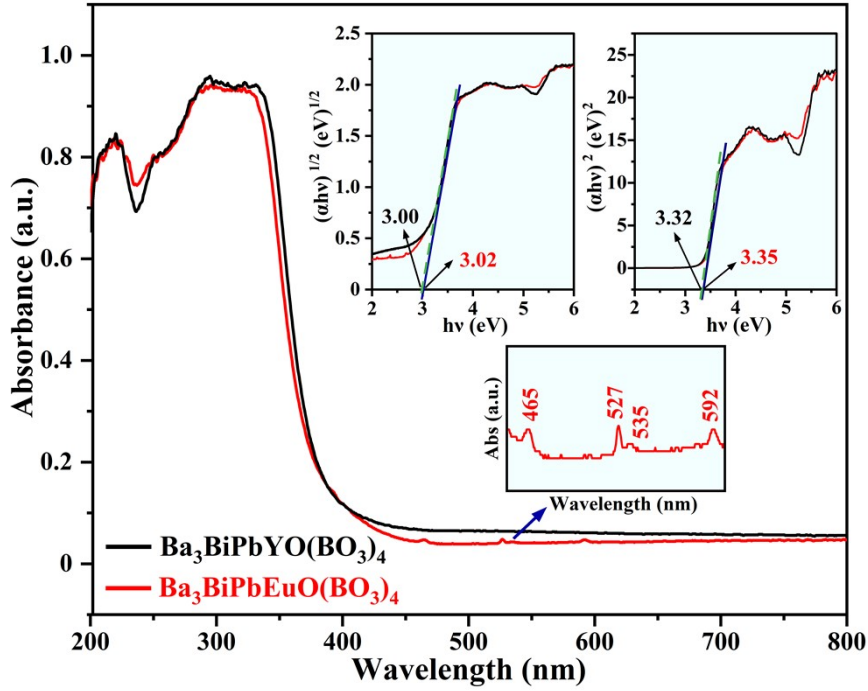

**Fig. S6** UV–vis absorption spectrum of  $\text{Ba}_3\text{BiPbEuO}(\text{BO}_3)_4$  as compared with that of  $\text{Ba}_3\text{BiPbYO}(\text{BO}_3)_4$ . The insets show the Tauc plots from indirect (left) and direct (right) transitions as well as local magnification of the UV–vis spectrum.

The optical band gap can be determined by the following Tauc formula:<sup>64</sup>

$$\alpha h\nu = A(h\nu - E_g)^n$$

where  $\alpha$ ,  $h\nu$ ,  $A$ , and  $E_g$  stand for the absorption coefficient, photonic energy, proportionality constant, and band gap, respectively. The exponent  $n$  denotes the nature of the sample transition,  $n = 1/2$  and  $2$  corresponding to direct and indirect allowed transitions, respectively. Here, we replace the absorption coefficient  $\alpha$  with the absorbance obtained from UV–vis spectra and plot  $(\alpha h\nu)^{1/n}$  as a function of  $h\nu$ . By extrapolating the linear part of the graphics to the axis of the abscissa, the indirect band gap of 3.02 eV and the direct band gap of 3.35 eV were obtained for  $\text{Ba}_3\text{BiPbEuO}(\text{BO}_3)_4$ , as shown in the insets of Fig. S6. For comparison, the UV–vis absorption spectrum of  $\text{Ba}_3\text{BiPbYO}(\text{BO}_3)_4$  was also displayed in Fig. S6. It was observed that the optical band gaps of the undoped material, derived from the turning point of the absorption edge in the absorption spectrum, were around 3.00 eV for indirect and 3.32 eV for direct transitions, respectively, which are slightly less than the corresponding ones observed in its Eu-analog.

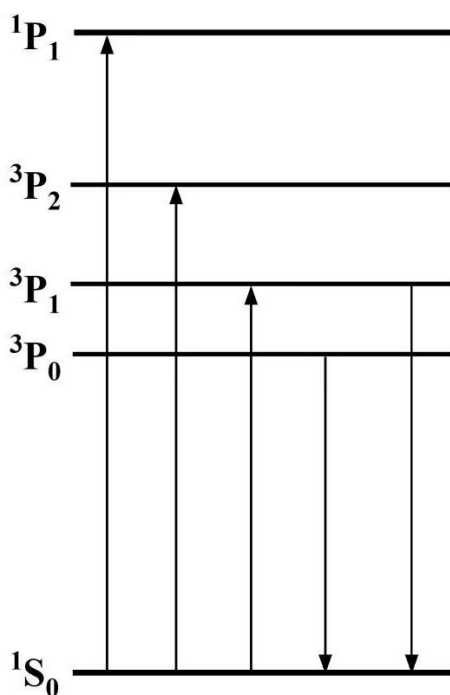

**Fig. S7** Schematic representation of the energy level scheme of a free ion with  $ns^2$  configuration ( $Pb^{2+}$ ,  $Bi^{3+}$  etc.).

The ground state of the free  $Pb^{2+}$  and  $Bi^{3+}$  ions is  $^1S_0$ , while the  $6s6p$  excited states give rise to the triplet levels ( $^3P_0$ ,  $^3P_1$ ,  $^3P_2$ ) and the  $^1P_1$  singlet state in sequence of energy increase (see Fig. S7). The lowest energy  $^1S_0 \rightarrow ^3P_0$  transition is strongly forbidden, but the  $^1S_0 \rightarrow ^3P_1$  and  $^1S_0 \rightarrow ^3P_2$  transitions become more allowed due to spin-orbit coupling and coupling to asymmetrical phonon modes, respectively. The  $^1S_0 \rightarrow ^1P_1$  transition is parity- and spin-allowed, but the  $^1P_1$  state has higher energy than the  $^3P_1$  state. The emission from the  $^3P_1 \rightarrow ^1S_0$  transition is usually observed at room temperature, although the highly forbidden  $^3P_0 \rightarrow ^1S_0$  emission is also observed at low temperatures.<sup>65</sup>

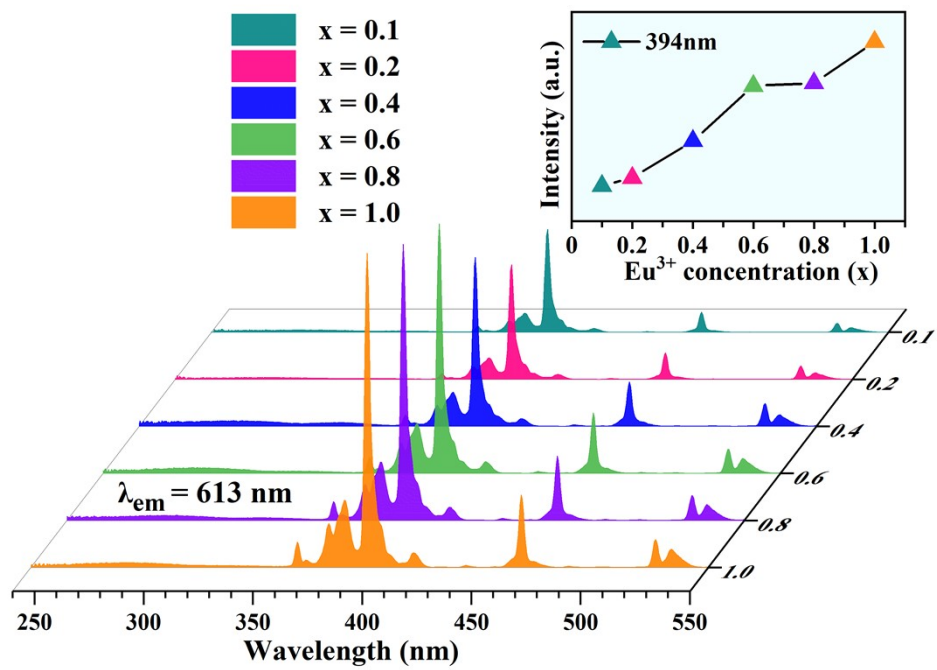

**Fig. S8** PLE spectra of  $\text{Ba}_3\text{BiPbY}_{1-x}\text{Eu}_x\text{O}(\text{BO}_3)_4$  ( $0.1 \leq x \leq 1.0$ ) phosphors. Inset is the variation of 394 nm ( ${}^7\text{F}_0 \rightarrow {}^5\text{L}_6$  of  $\text{Eu}^{3+}$ ) excitation intensity.

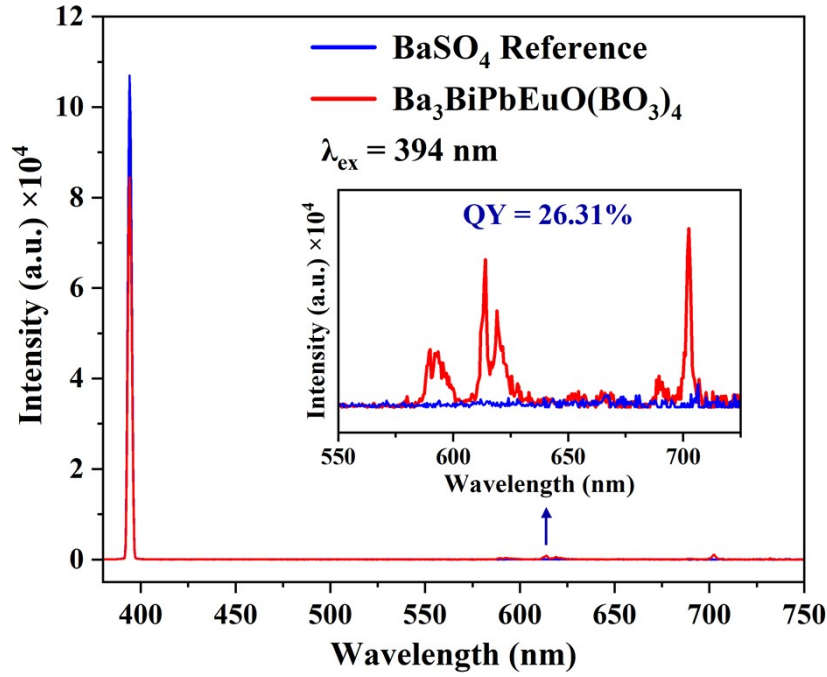

**Fig. S9** Excitation line of BaSO<sub>4</sub> reference and the PL spectrum of the Ba<sub>3</sub>BiPbEuO(BO<sub>3</sub>)<sub>4</sub> phosphor collected using an integrating sphere ( $\lambda_{\text{ex}} = 394$  nm); inset shows a local magnification of the PL spectrum.

The quantum yield (QY for short) can be determined by an integrated sphere method based on the following equation:

$$QY = \frac{\int L_S}{\int E_R - \int E_S}$$

Where  $\int L_S$  is the integrated intensity of the PL spectrum for the sample,  $\int E_R$  and  $\int E_S$  are the integrated intensities of the PLE spectra for BaSO<sub>4</sub> powder and the sample, respectively.<sup>79</sup> The excitation line of white BaSO<sub>4</sub> powder and emission spectrum of the Ba<sub>3</sub>BiPbEuO(BO<sub>3</sub>)<sub>4</sub> phosphor collected in an integrating sphere ( $\lambda_{\text{ex}} = 394$  nm) are presented in Fig. S9, where the QY is estimated to be about 26.31%. There are several ways to improve the QY property.<sup>80</sup> One is to co-dope various sensitizer and activator into the same host to increase the luminescence intensity through the energy transfer process. The other is to control the crystallite size or to explore alternative synthetic routes to reduce defects inducing non-radiative losses. We believe that the obtained QY value could be further enhanced by controlling the particle size, size distribution, morphology, and surface defects through optimization of the preparation conditions

and material compositions.
